# Supplementary material
Source: Springer Nature journal article supplement (https://www.springermedizin.de/resource/supplementary/13046_2011_456_MOESM2_ESM.pdf/9662272)

# THP-1

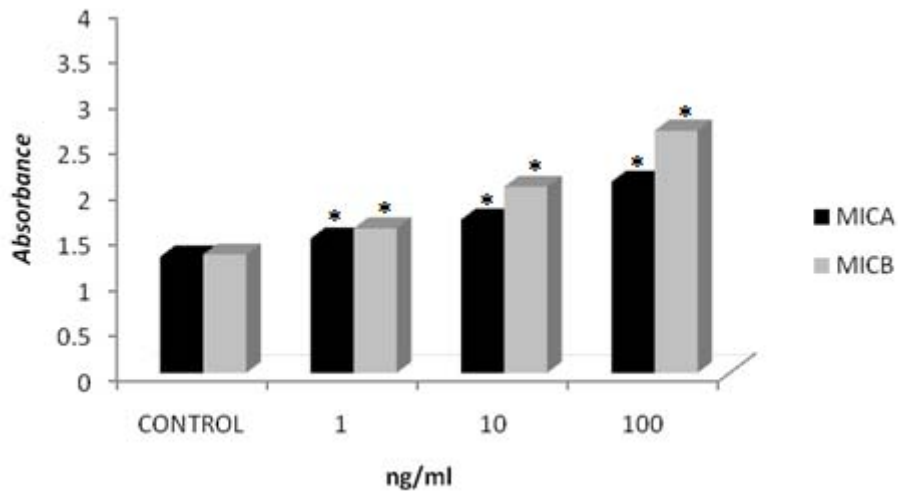

# U-937

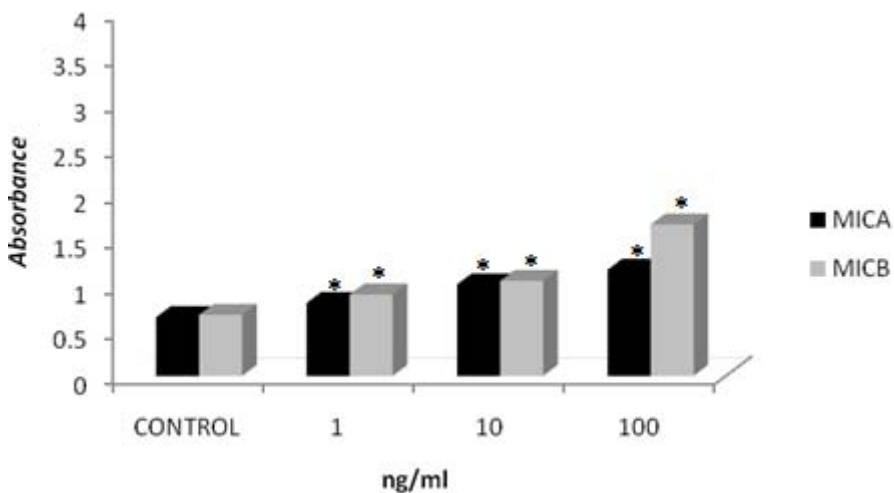

Supplement: MOESM2 [file 9662272]
